# Supplementary material for: Co-occurrence network of TV advertisements revealing Japanese lifestyle
Source: Springer Nature journal article supplement (doi:10.1007/s41109-021-00393-4), 2021-07-15
Supplement: MOESM1 [file 19366224]

# Supplementary Information for Co-occurrence network of TV advertisements revealing Japanese lifestyle

## S.1 Fitting power-law to strength distribution

We fitted a power law  $p(s) = (\alpha - 1)s_{\min}^{\alpha-1}s^{-\alpha}$  to the strength distribution  $p(s)$  of co-occurrence network for each year. We followed the procedure in Clauset et al [1].

Firstly, we set the lower bound  $s_{\min}$  of strength which follows a power law as any strength in the observed data. For  $s_{\min}$  and for the observed data of strength  $s_i$ , we derived the maximum likelihood estimator  $\hat{\alpha}$  of the scaling parameter as

$$\hat{\alpha} = 1 + N \left[ \sum_{i=1}^N \ln \frac{s_i}{s_{\min}} \right]^{-1},$$

where  $N$  is the number of nodes. We calculated Kormogorov-Smirnov (KS) statistics between the estimated distribution  $\hat{p}(s) = (\hat{\alpha} - 1)s_{\min}^{\hat{\alpha}-1}s^{-\hat{\alpha}}$  and the empirical distribution of the strength by only using strength greater than  $s_{\min}$ . After varying  $s_{\min}$ , we adopted the values of  $s_{\min}$  and  $\hat{\alpha}$  that correspond to the minimum value of KS statistics.

Subsequently, we tested the goodness of our fitting. We generated 2,500 sets of samples. Each of these samples consists of elements that follow the estimated power-law distribution for values greater than  $s_{\min}$  and follow the empirical distribution for the other values. KS statistics can be calculated for each generated set by applying the same procedure as that previously mentioned for the fitting to the observed data, and we can obtain the empirical distribution of KS statistics. The fraction of generated sets that exhibited KS statistics larger than the one of the observed data can be regarded as  $p$ -value for the null hypothesis that the observed data obeys a power-law. Table S.1 exhibits the detailed results of the fitting. According to Clauset et al.,  $p$ -value is needed to be greater than 0.1 to conclude that the observed data obeys a power law [1]. Therefore, co-occurrence networks of TV commercials in 2009, 2013 and 2014 can be regarded as following power laws, while networks for the other years also exhibit a strong heterogeneity in the strength distribution.

Table S.1: Results of fitting. For each year, the minimum value  $s_{\min}$ , the proportion of nodes that have the strength greater than  $s_{\min}$ , which is complementary cumulative probability  $P(> s_{\min})$ , KS statistics, the estimated value of  $\alpha$  and  $p$ -value of a goodness-of-fit test are shown.

| Year | $s_{\min}$ | $P(> s_{\min})$ | KS    | $\alpha$ | $p$ -value |
|------|------------|-----------------|-------|----------|------------|
| 2006 | 0.17       | 0.053           | 0.027 | 2.17     | 0.0028     |
| 2007 | 0.14       | 0.080           | 0.026 | 2.10     | 0.0004     |
| 2008 | 0.19       | 0.072           | 0.023 | 2.13     | 0.0468     |
| 2009 | 0.27       | 0.055           | 0.024 | 2.14     | 0.1060     |
| 2010 | 0.42       | 0.041           | 0.026 | 2.16     | 0.0404     |
| 2011 | 0.28       | 0.063           | 0.023 | 2.13     | 0.0208     |
| 2012 | 0.05       | 0.334           | 0.026 | 2.01     | 0.0000     |
| 2013 | 0.50       | 0.034           | 0.022 | 2.24     | 0.2624     |
| 2014 | 0.48       | 0.036           | 0.022 | 2.23     | 0.2244     |
| 2015 | 0.10       | 0.195           | 0.022 | 2.15     | 0.0000     |
| 2016 | 0.48       | 0.037           | 0.021 | 2.21     | 0.0480     |
| 2017 | 0.12       | 0.173           | 0.019 | 2.12     | 0.0000     |
| 2018 | 0.15       | 0.163           | 0.017 | 2.08     | 0.0000     |
| 2019 | 0.75       | 0.034           | 0.022 | 2.16     | 0.0576     |
| 2020 | 0.24       | 0.101           | 0.020 | 2.10     | 0.0156     |

## S.2 Community structure

Tables S.2-S.6 show four nodes with the largest strength in the communities that have the first to the seventh largest size for each year.

Table S.2: The size and four nodes with the largest strength in each community from 2006 to 2008.

| Year | Size | Nodes with the first to the forth largest strength |                |             |                |
|------|------|----------------------------------------------------|----------------|-------------|----------------|
| 2006 | 3189 | cinema scope                                       | sing           | dance       | black & white  |
|      | 2760 | woman                                              | walk           | eat         | inside a store |
|      | 2219 | animation                                          | run            | boy         | C.G.           |
|      | 1325 | man                                                | drink          | tell        | train          |
|      | 1238 | family                                             | married couple | mother      | child          |
|      | 975  | logo                                               | white back     | black back  | small screen   |
|      | 911  | man & woman                                        | rain           | cry         | kiss           |
| 2007 | 2386 | cinema scope                                       | sea            | performance | forest         |
|      | 2114 | woman                                              | indoor         | photo       | PC             |
|      | 1891 | animation                                          | boy            | run         | C.G.           |
|      | 1825 | man                                                | tell           | office      | TV             |
|      | 1762 | product                                            | white back     | logo        | black back     |
|      | 1716 | family                                             | eat            | child       | mother         |
|      | 1175 | man & woman                                        | walk           | city        | car            |
| 2008 | 2652 | woman                                              | product        | drink       | tell           |
|      | 2566 | cinema scope                                       | performance    | live        | night          |
|      | 2255 | animation                                          | run            | boy         | illustration   |
|      | 2086 | indoor                                             | family         | child       | eat            |
|      | 1607 | man                                                | sea            | bicycle     | laugh          |
|      | 1044 | girl                                               | white back     | character   | logo           |
|      | 737  | dance                                              | rotating       | stage       | audience       |

Table S.3: The size and four nodes with the largest strength in each community from 2009 to 2011.

| Year | Size | Nodes with the first to the fourth largest strength |               |                 |                |
|------|------|-----------------------------------------------------|---------------|-----------------|----------------|
| 2009 | 2451 | woman                                               | indoor        | drink           | tell           |
|      | 2382 | cinema scope                                        | aerial view   | cherry blossoms | building       |
|      | 2099 | animation                                           | girl          | run             | boy            |
|      | 1972 | product                                             | white back    | small screen    | black back     |
|      | 1775 | man                                                 | TV            | office          | phone          |
|      | 1702 | family                                              | eat           | child           | married couple |
|      | 1146 | sing                                                | dance         | live            | performance    |
| 2010 | 2966 | woman                                               | tell          | indoor          | walk           |
|      | 2375 | product                                             | white back    | drink           | small screen   |
|      | 2356 | cinema scope                                        | TV            | poster          | CM             |
|      | 2335 | animation                                           | girl          | run             | boy            |
|      | 2001 | eat                                                 | family        | child           | mother         |
|      | 1958 | man                                                 | office        | suited man      | stairs         |
|      | 1606 | sing                                                | dance         | black & white   | live           |
| 2011 | 3201 | woman                                               | indoor        | walk            | room           |
|      | 2409 | eat                                                 | family        | child           | married couple |
|      | 2390 | animation                                           | girl          | boy             | run            |
|      | 2021 | man                                                 | black & white | office          | kimono woman   |
|      | 1567 | character                                           | white back    | black back      | logo           |
|      | 1528 | cinema scope                                        | sea           | sky             | flower         |
|      | 1468 | sing                                                | dance         | dance           | performance    |

Table S.4: The size and four nodes with the largest strength in each community from 2012 to 2014.

| Year | Size | Nodes with the first to the fourth largest strength |                |                |                |
|------|------|-----------------------------------------------------|----------------|----------------|----------------|
| 2012 | 3335 | animation                                           | cinema scope   | girl           | run            |
|      | 2864 | woman                                               | indoor         | walk           | room           |
|      | 2112 | sing                                                | dance          | black & white  | dance          |
|      | 1962 | product                                             | character      | illustration   | married couple |
|      | 1903 | drink                                               | eat            | logo           | cooking        |
|      | 1837 | man                                                 | office         | surprise       | phone          |
|      | 1696 | family                                              | child          | mother         | girl           |
| 2013 | 3702 | woman                                               | product        | indoor         | room           |
|      | 3381 | animation                                           | cinema scope   | girl           | character      |
|      | 2160 | man                                                 | black & white  | surprise       | phone          |
|      | 1984 | family                                              | married couple | child          | mother         |
|      | 1969 | city                                                | walk           | car            | sea            |
|      | 1741 | sing                                                | dance          | dance          | live           |
|      | 1563 | eat                                                 | drink          | inside a store | cooking        |
| 2014 | 3848 | woman                                               | product        | indoor         | walk           |
|      | 3317 | animation                                           | cinema scope   | character      | logo           |
|      | 2700 | family                                              | eat            | married couple | mother         |
|      | 2196 | man                                                 | office         | conversation   | phone          |
|      | 1955 | city                                                | sea            | flower         | surprise       |
|      | 1787 | sing                                                | dance          | dance          | live           |
|      | 1214 | character                                           | white back     | black back     | rotating       |

Table S.5: The size and four nodes with the largest strength in each community from 2015 to 2017.

| Year | Size | Nodes with the first to the forth largest strength |            |                 |                |
|------|------|----------------------------------------------------|------------|-----------------|----------------|
| 2015 | 4144 | animation                                          | logo       | girl            | boy            |
|      | 3394 | woman                                              | indoor     | walk            | smile          |
|      | 3364 | cinema scope                                       | run        | city            | car            |
|      | 3226 | eat                                                | drink      | family          | surprise       |
|      | 3139 | product                                            | tell       | illustration    | studio         |
|      | 2940 | man                                                | office     | conversation    | laugh          |
|      | 2363 | sing                                               | dance      | dance           | black & white  |
| 2016 | 6320 | woman                                              | product    | tell            | indoor         |
|      | 5598 | animation                                          | run        | girl            | boy            |
|      | 3975 | eat                                                | family     | married couple  | red back       |
|      | 2795 | man                                                | office     | laugh           | bicycle        |
|      | 2768 | black back                                         | sing       | dance           | jump           |
|      | 2458 | sea                                                | city       | night           | sky            |
|      | 2152 | character                                          | logo       | white back      | blue back      |
| 2017 | 4612 | animation                                          | girl       | character       | game screen    |
|      | 4569 | product                                            | tell       | smile           | studio         |
|      | 3934 | eat                                                | family     | laugh           | married couple |
|      | 3824 | cinema scope                                       | sea        | aerial view     | night          |
|      | 3776 | logo                                               | white back | character       | smartphone     |
|      | 3573 | woman                                              | indoor     | walk            | office         |
|      | 2428 | dance                                              | sing       | white back logo | many people    |

Table S.6: The size and four nodes with the largest strength in each community from 2018 to 2020.

| Year | Size | Nodes with the first to the fourth largest strength |                 |                 |                  |
|------|------|-----------------------------------------------------|-----------------|-----------------|------------------|
| 2018 | 5369 | product                                             | man & woman     | drink           | pose             |
|      | 4091 | animation                                           | white back logo | girl            | character        |
|      | 3828 | eat                                                 | family          | laugh           | parent and child |
|      | 3608 | logo                                                | white back      | telop           | jump             |
|      | 3546 | cinema scope                                        | black back      | dance           | sing             |
|      | 3450 | woman                                               | smile           | walk            | indoor           |
|      | 3286 | aerial view                                         | sea             | car             | night            |
| 2019 | 4590 | product                                             | indoor          | a word          | round frame      |
|      | 4471 | cinema scope                                        | aerial view     | walk            | close-up a face  |
|      | 4265 | black back                                          | animation       | white back logo | run              |
|      | 4143 | logo                                                | white back      | suited man      | rejoice          |
|      | 3414 | man                                                 | drink           | laugh           | surprise         |
|      | 3087 | eat                                                 | family          | photo           | parent and child |
|      | 2466 | woman                                               | smile           | pose            | office           |
| 2020 | 3147 | cinema scope                                        | black back      | white back logo | aerial view      |
|      | 2627 | product                                             | product in hand | round frame     | blue back        |
|      | 2576 | man                                                 | man & woman     | a word          | surprise         |
|      | 2035 | logo                                                | character       | smartphone      | illustration     |
|      | 1832 | animation                                           | girl            | character       | boy              |
|      | 1529 | white back                                          | room            | bed             | children         |
|      | 1418 | woman                                               | walk            | another woman   | step             |

### S.3 Relationship between communities and categories

We show the relationship  $w_{l,k}$  between categories and communities that have the first to the tenth-largest size in each year in Figs S.1-S.5.



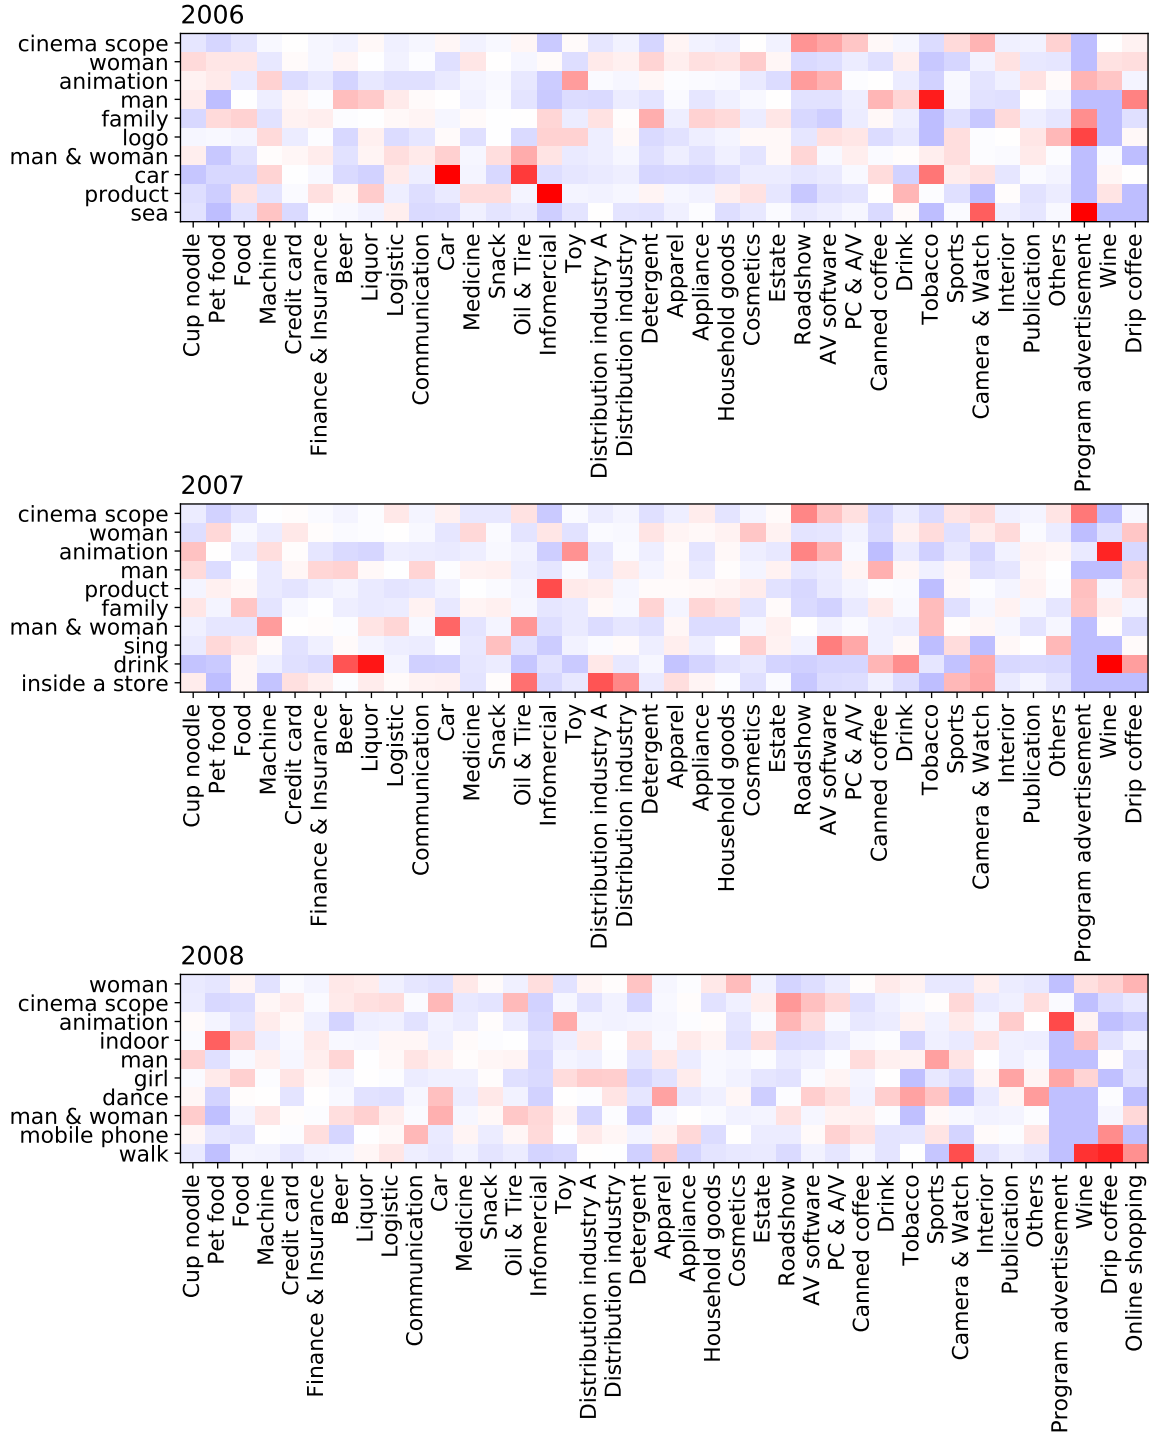

Figure S.1: Relationship  $w_{l,k}$  between communities and categories from 2006 to 2008. The horizontal and vertical axes show the categories and the representative nodes in the communities, respectively.

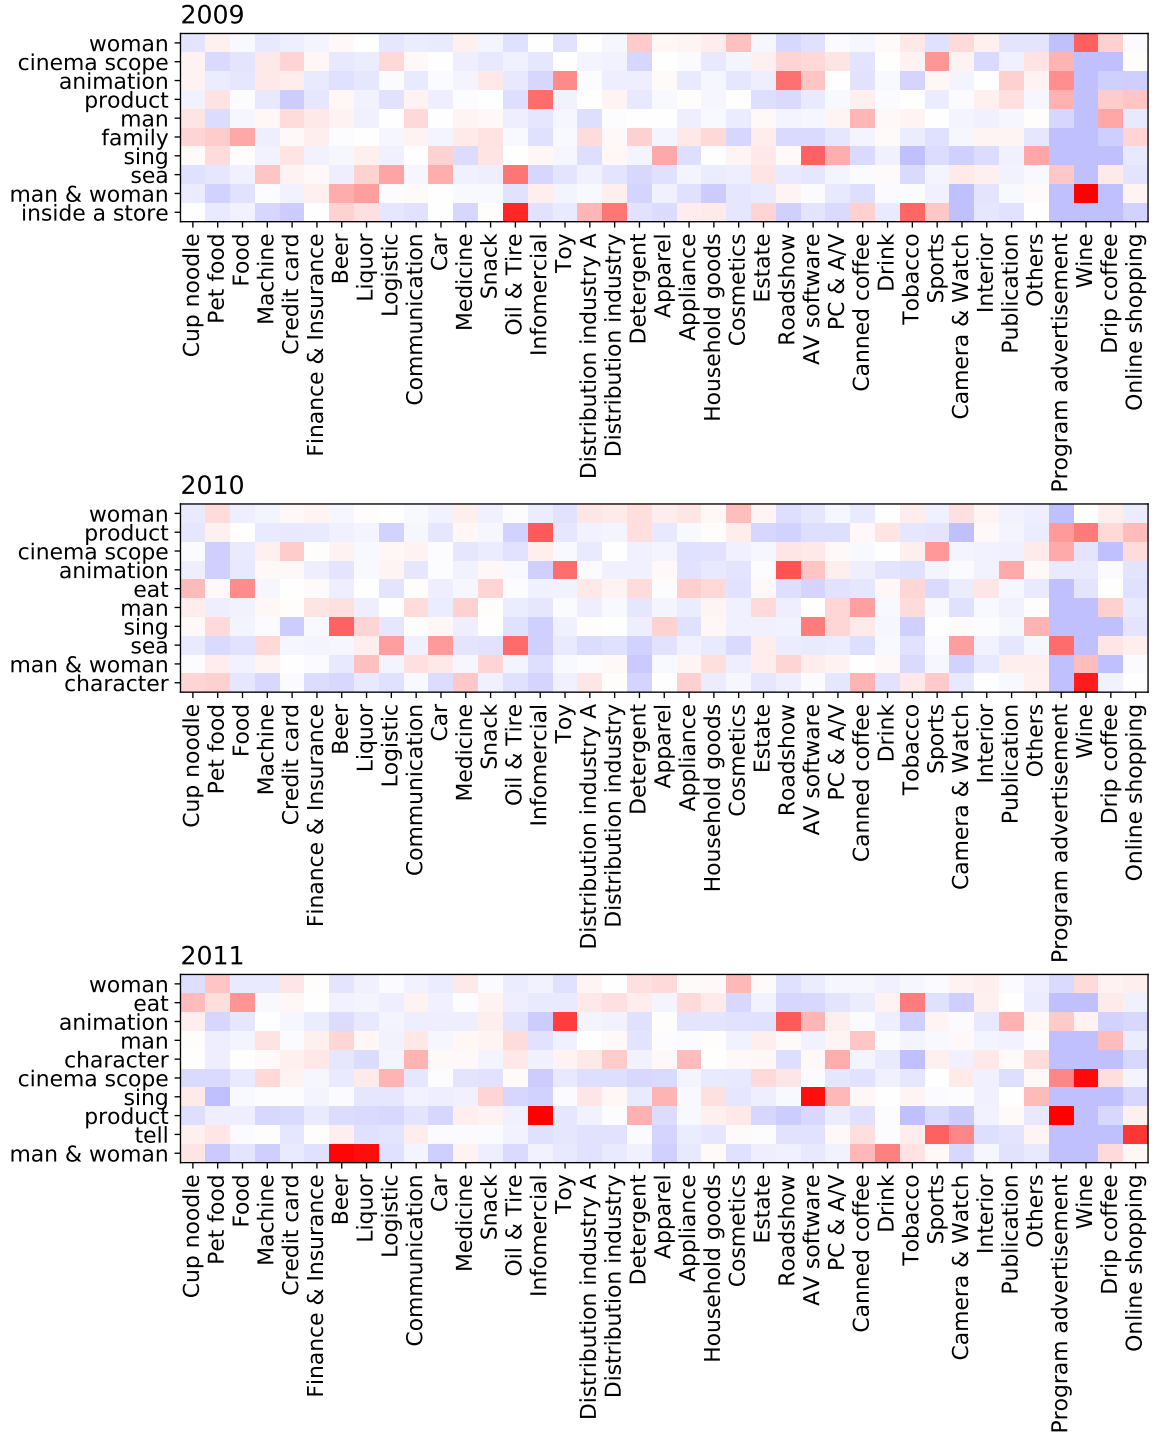

Figure S.2: Relationship  $w_{l,k}$  between communities and categories from 2009 to 2011. The horizontal and vertical axes show the categories and the representative nodes in the communities, respectively.

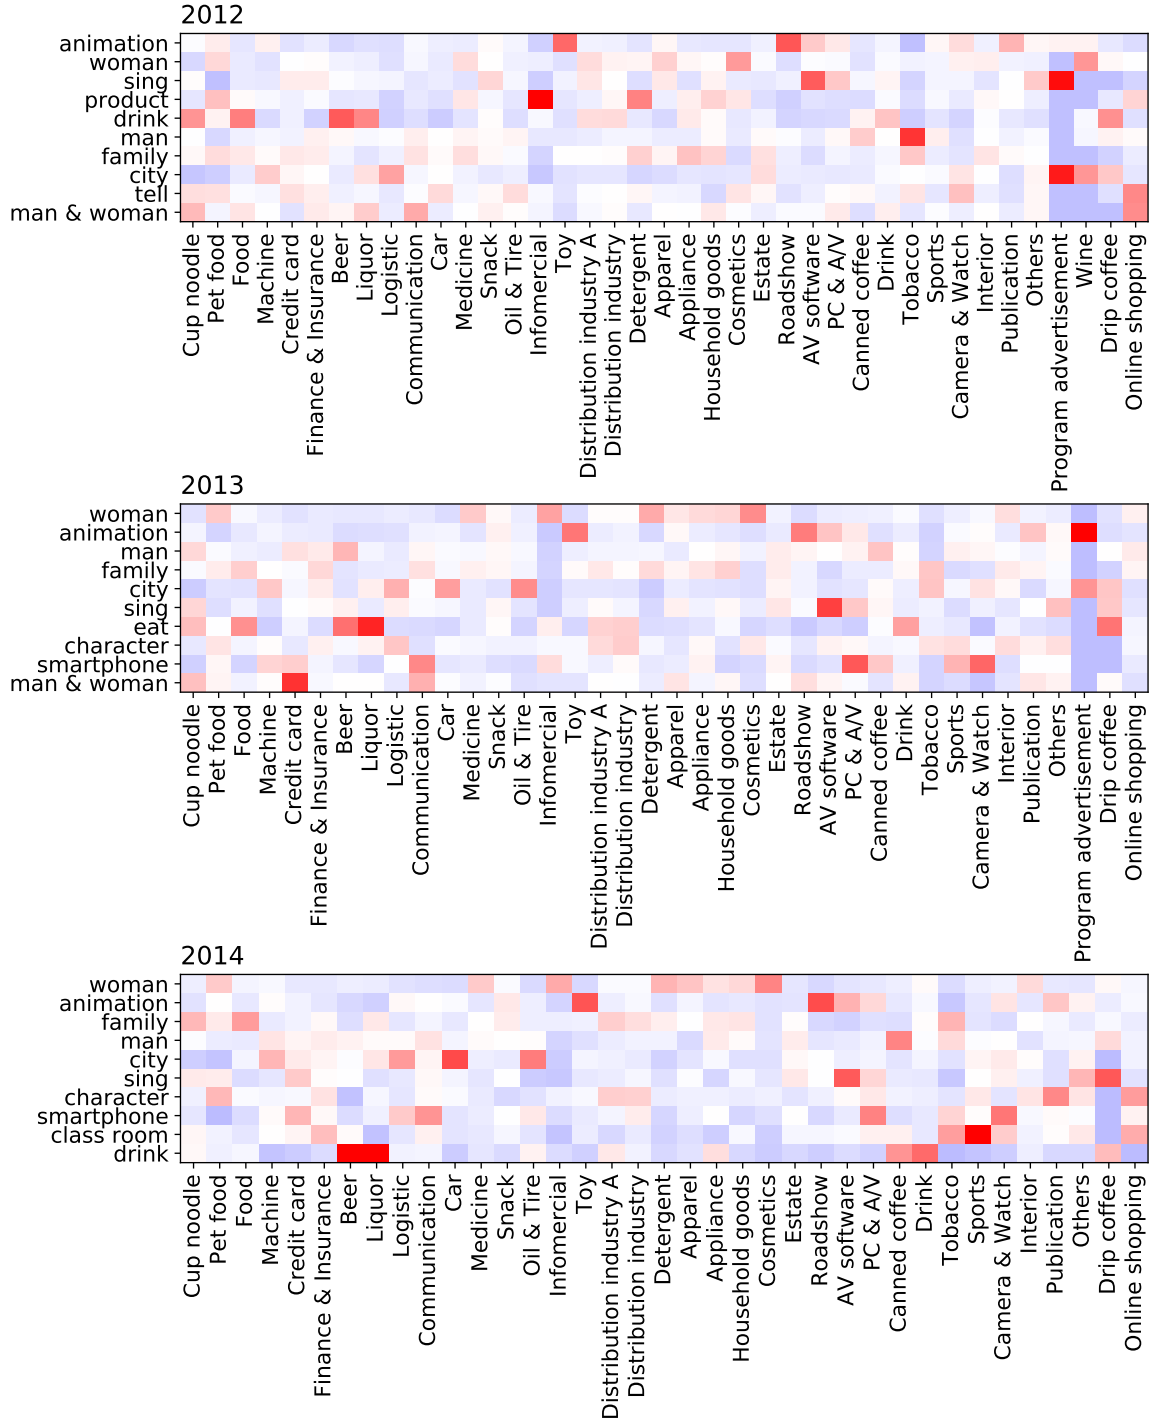

Figure S.3: Relationship  $w_{l,k}$  between communities and categories from 2012 to 2014. The horizontal and vertical axes show the categories and the representative nodes in the communities, respectively.

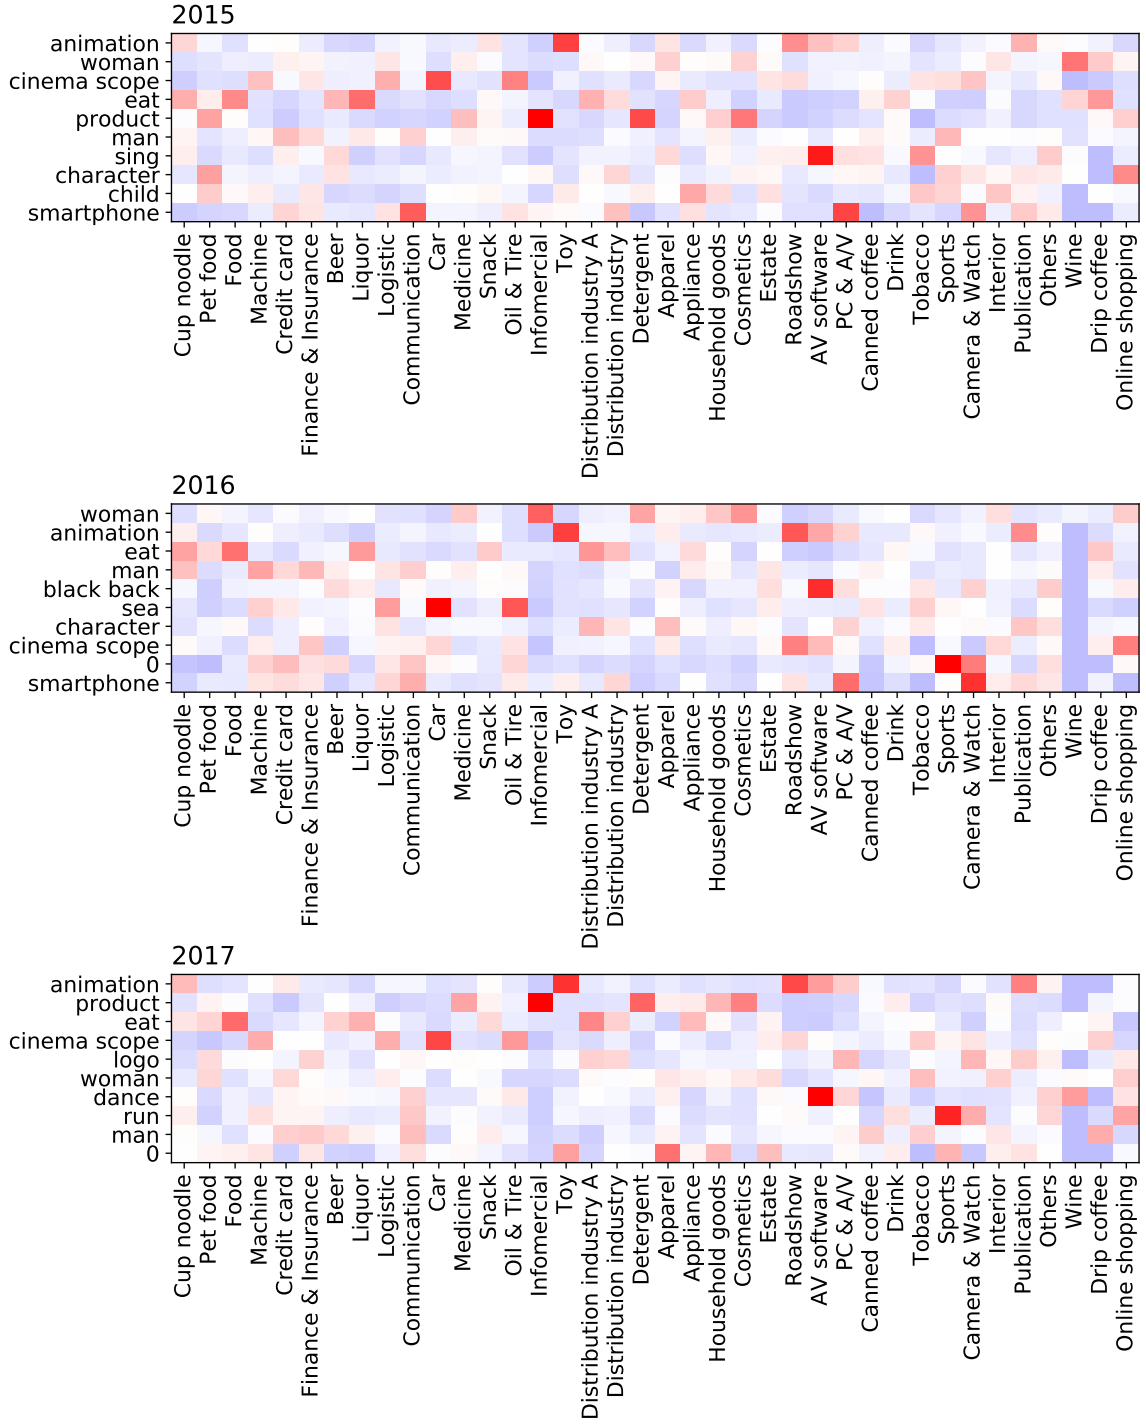

Figure S.4: Relationship  $w_{l,k}$  between communities and categories from 2015 to 2017. The horizontal and vertical axes show the categories and the representative nodes in the communities, respectively.

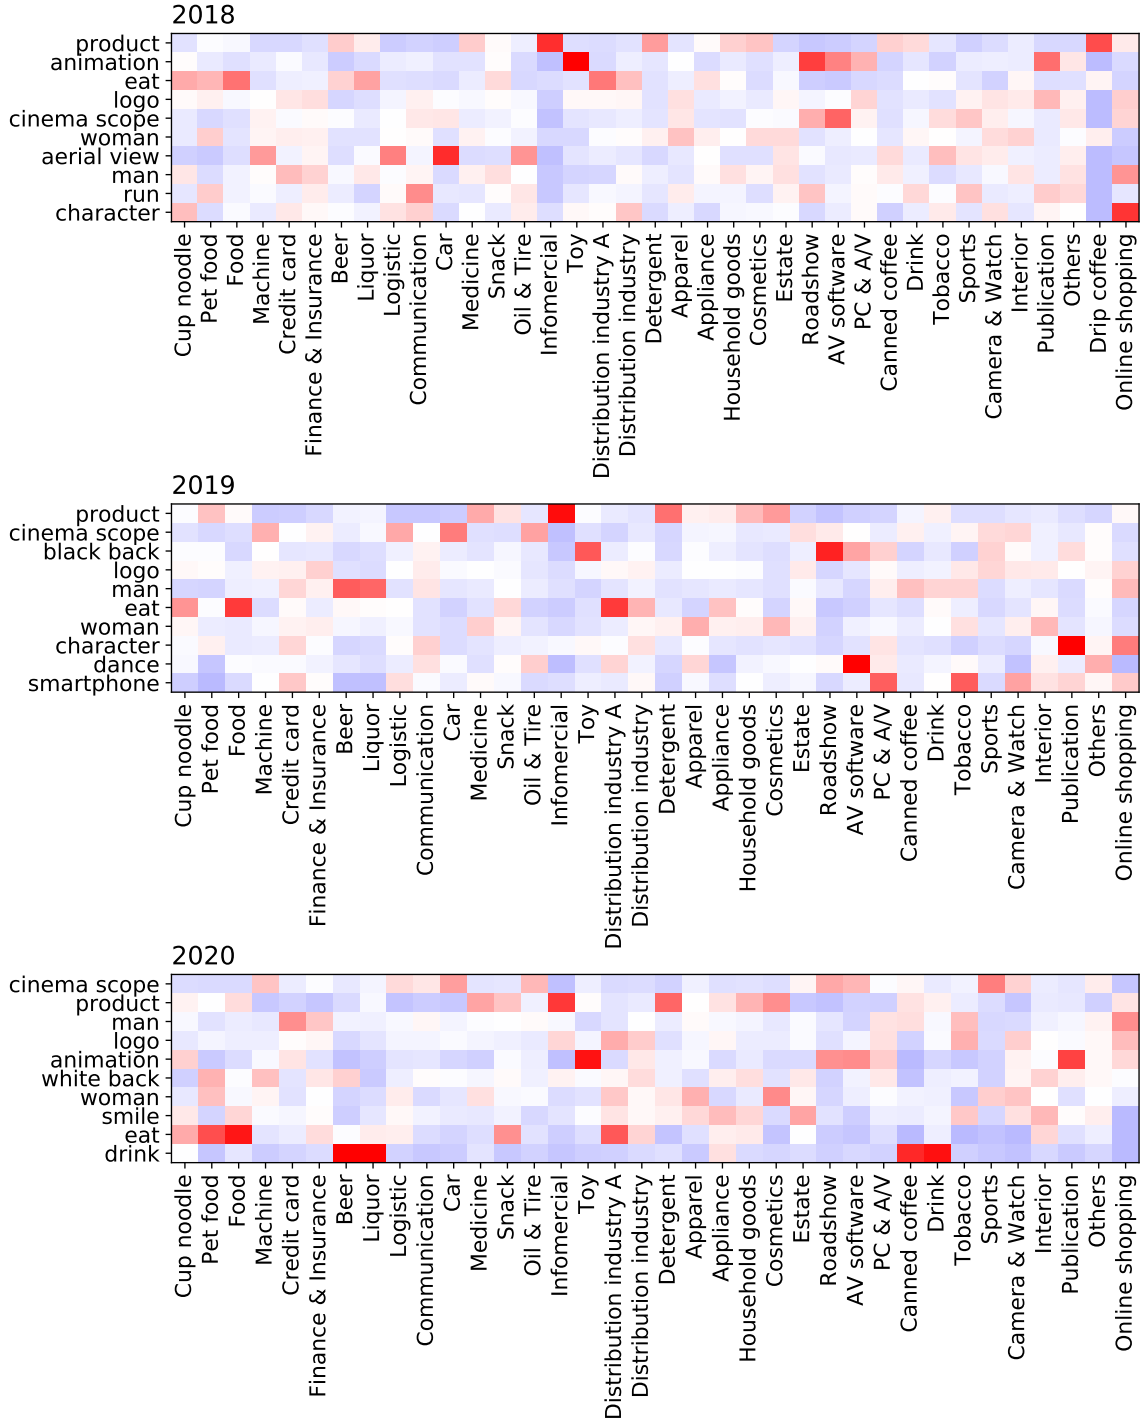

Figure S.5: Relationship  $w_{l,k}$  between communities and categories from 2018 to 2020. The horizontal and vertical axes show the categories and the representative nodes in the communities, respectively.

## References

- [1] Clauset, A., Shalizi, C.R., Newman, M.E.J.: Power-law distributions in empirical data. *SIAM Rev* **51**(4), 661–703 (2009)
